# Supplementary material
Source: PubMed Central journal article supplement (PMC4118754)
Supplement: NIHMS597390-supplement-Supporting_Information.pdf [file NIHMS597390-supplement-Supporting_Information.pdf]

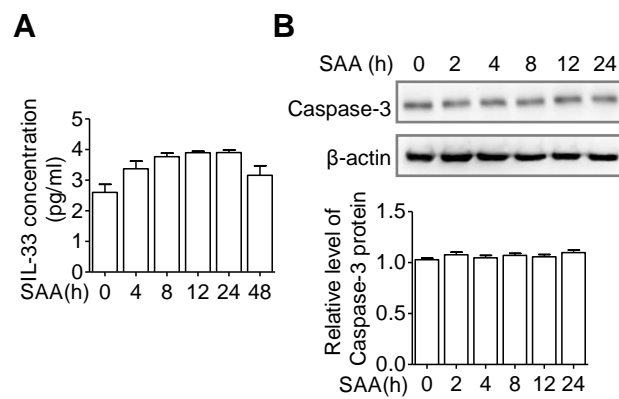

**Supporting Information Figure 1**, IL-33 protein in culture medium and caspase-3 activity in SAA-activated monocytes. (A) THP-1 cells were stimulated with 0.05  $\mu$ M SAA for the indicated times. IL-33 in the culture medium was measured by ELISA. The results are representative of three independent experiments. (B) THP-1 cells were stimulated with 0.05  $\mu$ M SAA for the indicated times. Caspase-3 protein activity was detected by Western blotting with a specific anti-caspase-3 antibody. Data are representative of three samples pooled from three independent experiments and densitometry values (means + SEM) are shown (B).

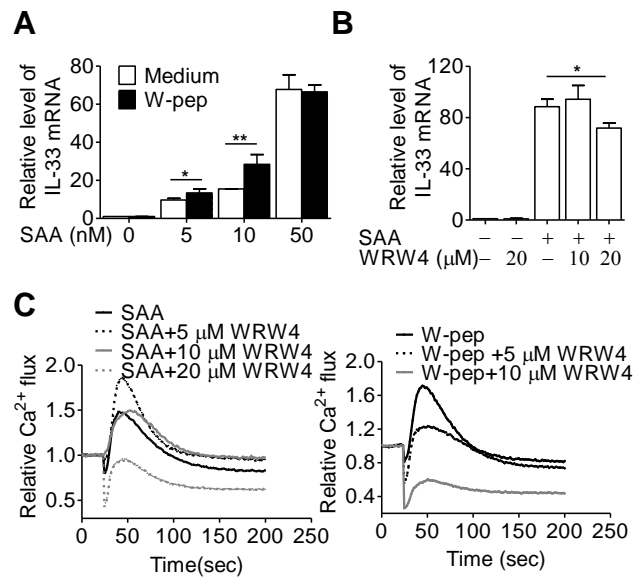

**Supporting Information Figure 2**, Effect of FPR2 agonist and antagonist on SAA-induced IL-33 expression. (A) THP-1 cells were stimulated for 8 h with WKYMVm (W-pep, 500 nM), together with different concentrations of SAA (1 nM to 50 nM). Relative changes in IL-33 mRNA were detected by quantitative real-time PCR. (B) WRW4 at indicated concentrations was applied to THP-1 cells 1 h before SAA (0.05  $\mu$ M) stimulation for 8 h. Data shown are means + SEM of six samples pooled from three independent stimulation experiments. \* $p < 0.05$ , \*\* $p < 0.01$ , one-way ANOVA followed by Bonferroni post-testing. (C) THP-1 cells were pretreated with or without WRW4 at the indicated concentrations for 1 h and then stimulated with 0.1  $\mu$ M SAA and W-pep (0.1  $\mu$ M), respectively. The changes in intracellular calcium were analyzed. Data were acquired by SoftMax Pro 6 (Molecular Devices) and a typical set of calcium traces from one representative experiment (total of 3) is shown.

**A**

|        |        | <u>IRF7 #1</u> | <u>IRF7 #2</u>                                               |      |
|--------|--------|----------------|--------------------------------------------------------------|------|
| WT     | probe: | -277           | AACAGAATTTCAAATGGACAGTGCTGAAGTTGAAGTTAGGA                    | -235 |
| Mut.A  | probe: | -277           | AACAT <u>TGCG</u> TTCAAATGGACAGTGCTGAAGTTGAAGTTAGGA          | -235 |
| Mut.B  | probe: | -277           | AACAGAATTTCAAATGGACAGTGCT <u>TCGATT</u> GAAGTTAGGA           | -235 |
| Mut.AB | probe: | -277           | AACAT <u>TGCG</u> TTCAAATGGACAGTGCT <u>TCGATT</u> GAAGTTAGGA | -235 |

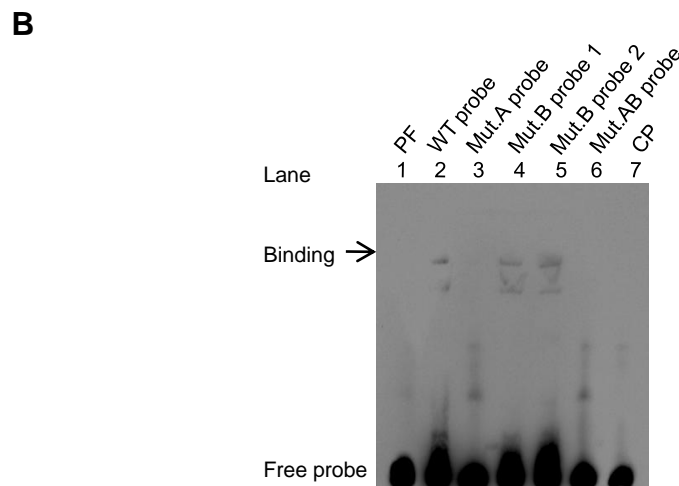

**Supporting Information Figure 3**, IRF7 binding to IRF7 #1 site in IL-33 promoter in vitro. (A) Probe sequence and the mutations introduced. WT probe, -277/-235 region of IL-33 promoter with both IRF7 #1 and IRF7 #2 binding sites; Mut.A probe, mutations in IRF7 #1 sites (underlined); Mut.B probe, mutations in IRF7 #2 (underlined); Mut.AB probe, mutations in both IRF7 #1 and IRF7 #2 binding sites (underlined). (B) EMSA with WT or mutant probes of the human IL-33 promoter was performed on HEK-293T cell nuclear protein extracts after overexpression of HA-tagged IRF7. Approximately 50 fmol probe were used in Lane 1-6 except for Lane 5 (100 fmol). PF, protein free; CP, cold competitor probe. Data are representative of three experiments.

**Supporting Information Table 1:** Primers used for plasmid construction and RT-PCR.

| <b>Primer Name</b>        | <b>Forward Primer<br/>(5'-3')</b>      | <b>Reverse Primer<br/>(5'-3')</b>      |
|---------------------------|----------------------------------------|----------------------------------------|
| IL-33 pro (-1050 to +49)  | AGTTGAGCTCCCCAAGCCTGGTCA<br>GCCA       | GCGACTCGAGTTTCTTCCCTGAAGA<br>GCT       |
| IL-33 pro (-662 to +49)   | GCGAGAGCTCATTACTTCATCCCTTT<br>AT       | GCGACTCGAGTTTCTTCCCTGAAGA<br>GCT       |
| IL-33 pro (-520 to +49)   | ATTAGAGCTCATCTTCTGCGAGATT              | GCGACTCGAGTTTCTTCCCTGAAGA<br>GCT       |
| IL-33 pro (-460 to +49)   | ATATGAGCTCCCCGTCAGATATGTT              | GCGACTCGAGTTTCTTCCCTGAAGA<br>GCT       |
| IL-33 pro (-300 to +49)   | TATTGAGCTCGCCAAAAGTGAATAT              | GCGACTCGAGTTTCTTCCCTGAAGA<br>GCT       |
| IL-33 pro (-160 to +49)   | ATTAGAGCTCCAGATGGAGGGAGG<br>ACGC       | GCGACTCGAGTTTCTTCCCTGAAGA<br>GCT       |
| Human IRF7<br>(FL)        | ATAGGATCCATGGCCTTGGCTCCTG<br>AG        | TATCTCGAGCTAGGCGGGCTGCTC<br>CAG        |
| IL-33-pro Mut.<br>A       | ATATAAATGGCAACATGCGTTCAAAA<br>TGGACAGT | ACTGTCCATTTTGAACGCATGTTGC<br>CATTTATAT |
| IL-33-pro Mut.<br>B       | AAAATGGACAGTGCTTCGATTGAAG<br>TTTAGGAGT | ACTCCTAAACTTCAATCGAAGCACT<br>GTCCATTTT |
| Human IL-33               | TGAATCAGGTGACGGTGTT                    | TGGTCTGGCAGTGGTTTT                     |
| Human IRF7                | AGCCGTACCTGTCACCCTCC                   | CGCAGCAGTTCCTCCGTGT                    |
| Human GAPDH               | TCAAGAAGGTGGTGAAGCA                    | AAGGTGGAGGAGTGGGT                      |
| Mouse IL-33               | TTCTTCGTCCTTCACA                       | CATCTTTCTCCTCCACT                      |
| Mouse GAPDH               | CCTTCCGTGTTCCCTACCC                    | CAACCTGGTCCTCAGTGTAG                   |
| Chip Primer for<br>RT-PCR | GGACAGTGCTGAAGTTGAAGTTTA               | CGTCCTCCCTCCATCTGAATATTT               |
